# Supplementary material for: Comprehensive Analysis of 13C6 Glucose Fate in the Hypoxia-Tolerant Blind Mole Rat Skin Fibroblasts
Source: MDPI journal article supplement (doi:10.3390/metabo11110734), 2021-10-27
Supplement: s1 [file s1]

# Supplementary Materials

Figure S1

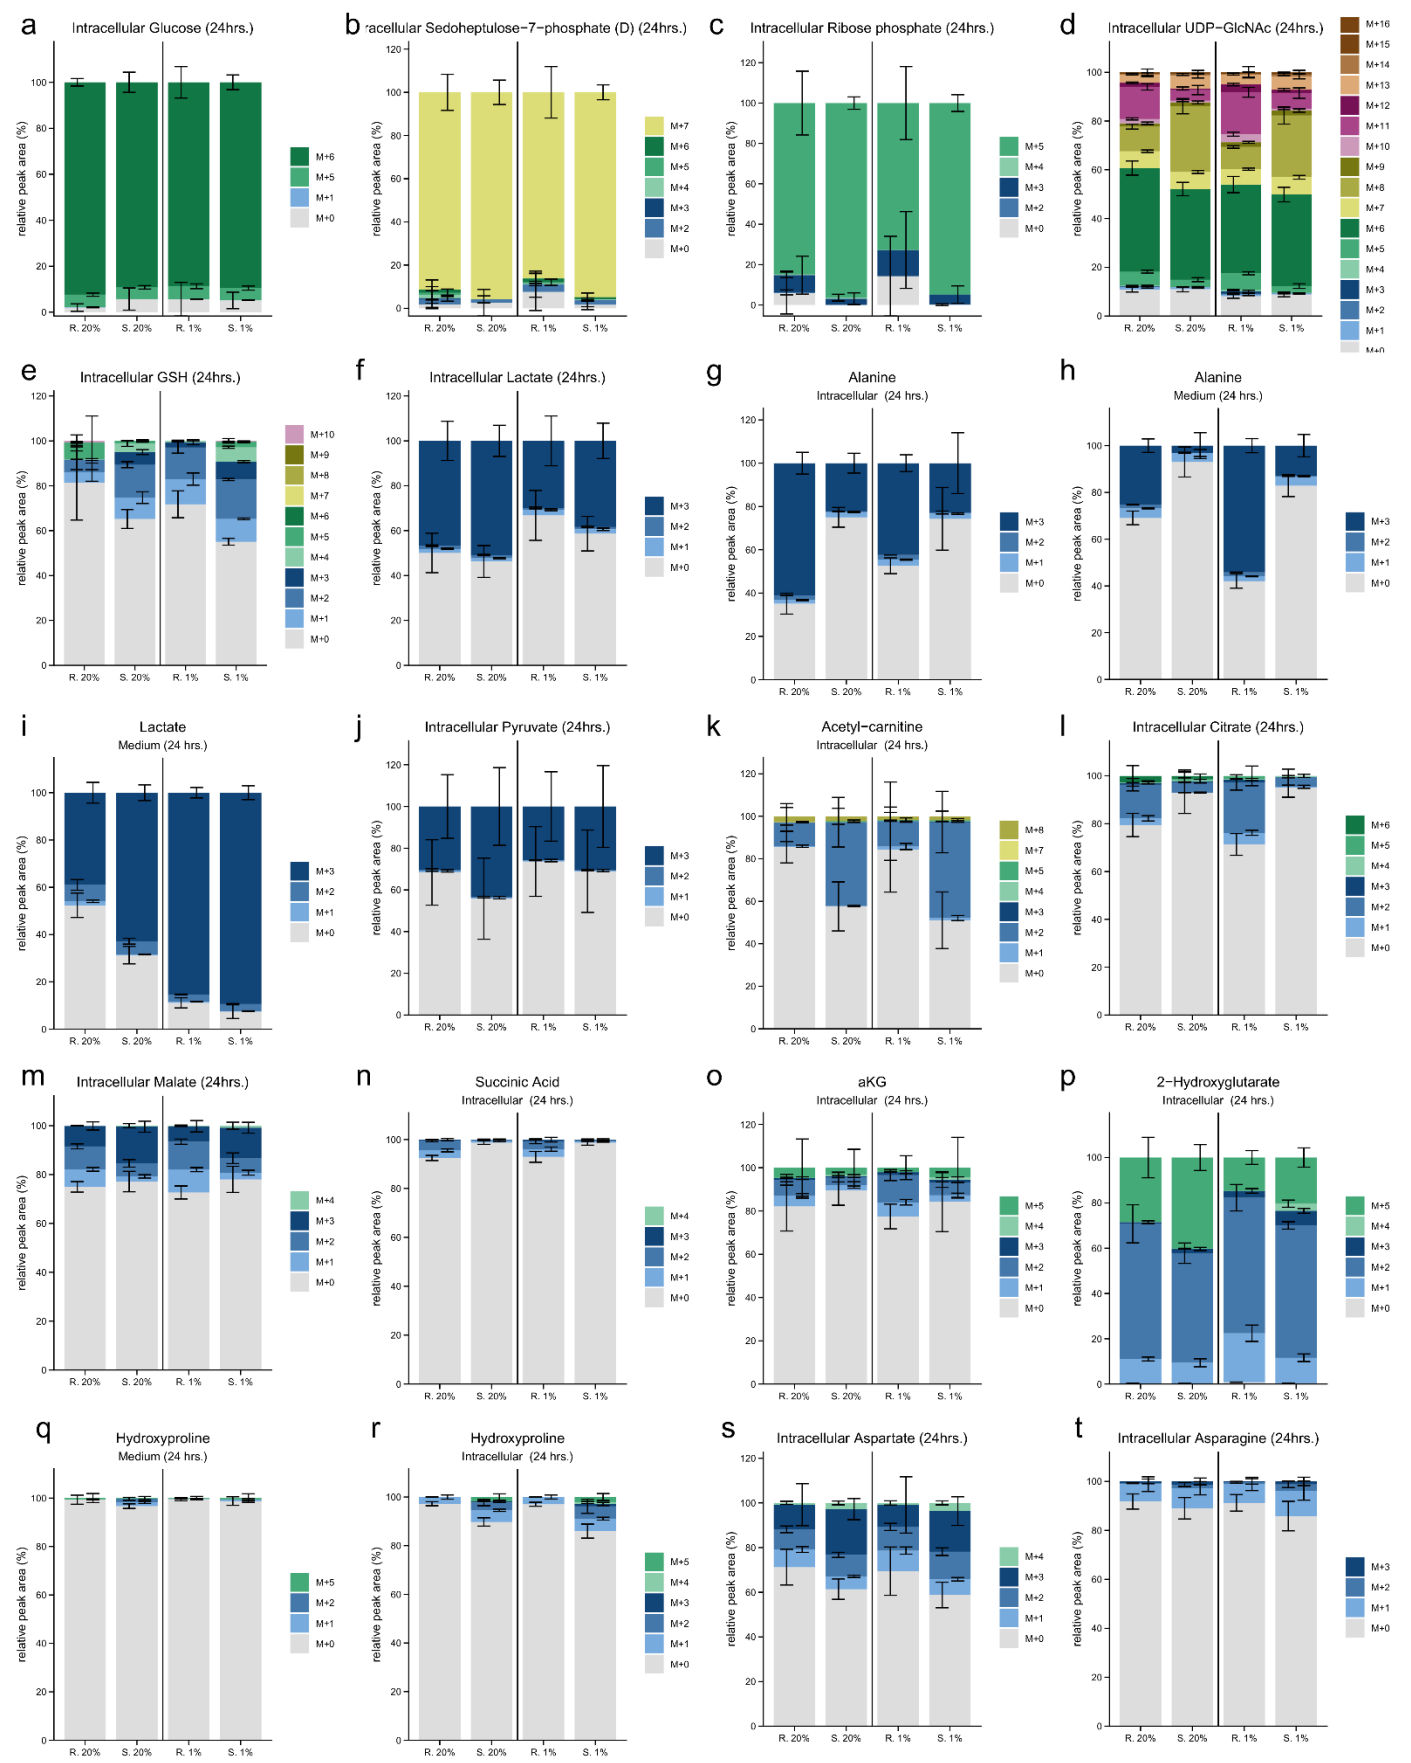

**Figure S1.** MID for selected metabolites (a-t) in *Spalax* and rat cells grown for 1 day in  $^{13}\text{C}_6$  - glucose containing medium. S.20%, R. 20%, S.1%, R1% represent *Spalax* (S) and rat (R) cells exposed to an atmosphere containing 20% or 1%  $\text{O}_2$ , respectively. Error bars represent standard deviation of 6 or more biological repeats.

Figure S2

## Panel A

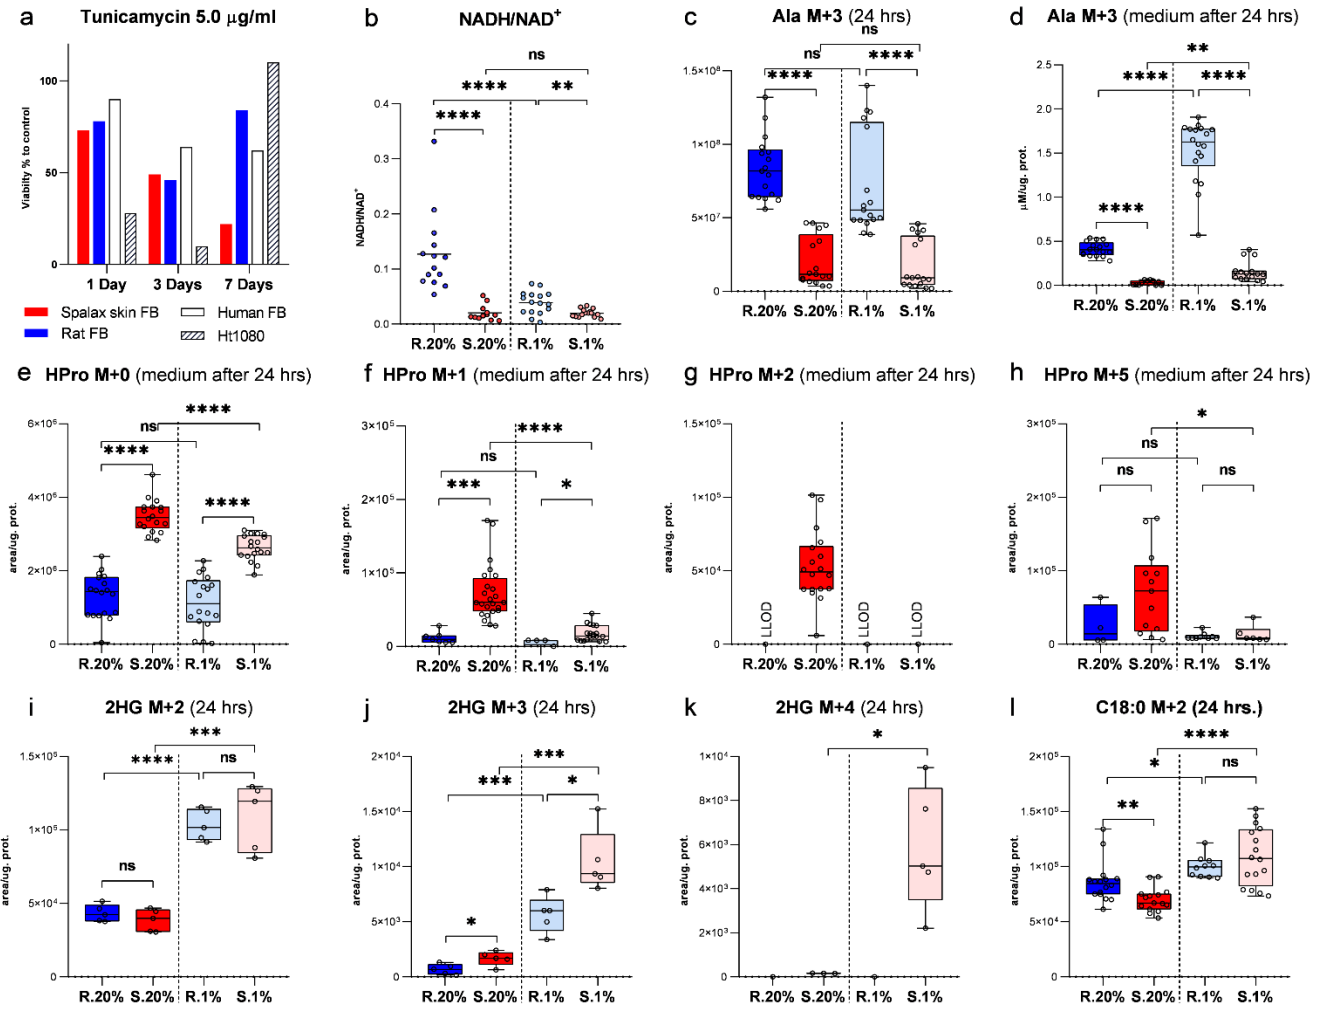

## Panel B

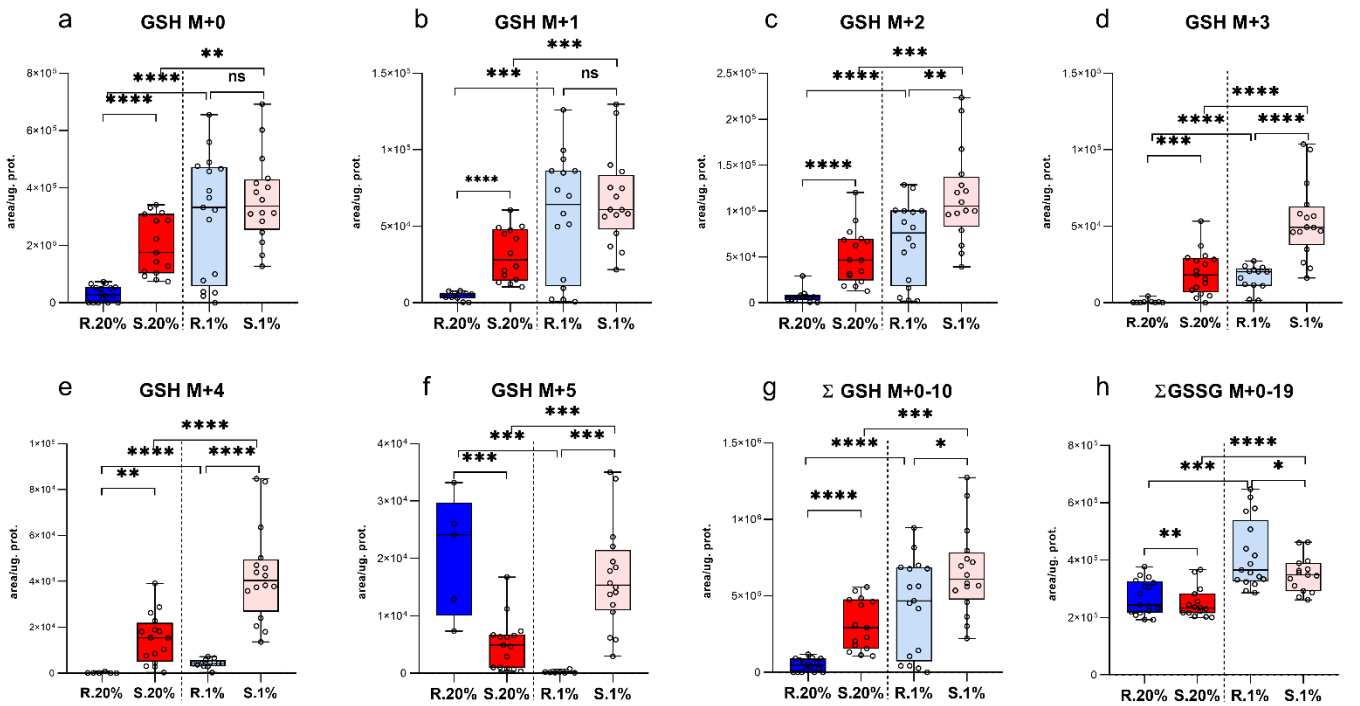

**Figure S2.** Panel A: Selected characteristics of  $^{13}\text{C}_6$  tracing in *Spalax* and rat cells grown for 1 day in  $^{13}\text{C}_6$  - glucose containing medium under normoxia and hypoxia. FB, fibroblasts; Ht1080, human fibrosarcoma cell line. Panel B: Mass isotopologues of GSH and sum of mass isotopologues of GSSG that contains Glc-derived carbons. S.20%, R. 20%, S.1%, R1% represent *Spalax* (S) and rat (R) cells exposed to an atmosphere containing 20% or 1%  $\text{O}_2$ , respectively; ns, (nonsignificant)  $p > 0.05$ ; \* $p < 0.05$ ; \*\* $p < 0.01$ ; \*\*\* $p < 0.001$ ; \*\*\*\*  $p < 0.0001$ , error bars represent standard deviation of 6 or more biological repeats. Every point on the chart represents one technical repeat.

Figure S3

M+2 flux to HPro

Panel A

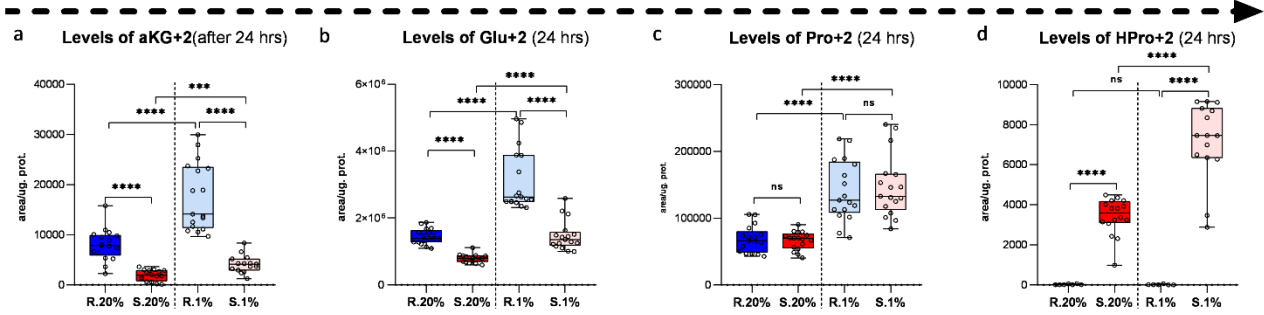

M+2 flux via the TCA cycle

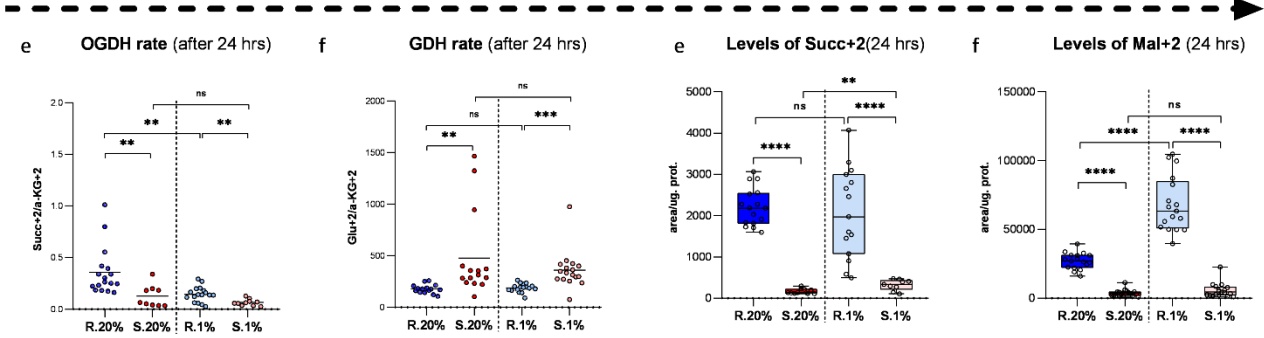

M+0

M+1

Panel B

M+3

M+4

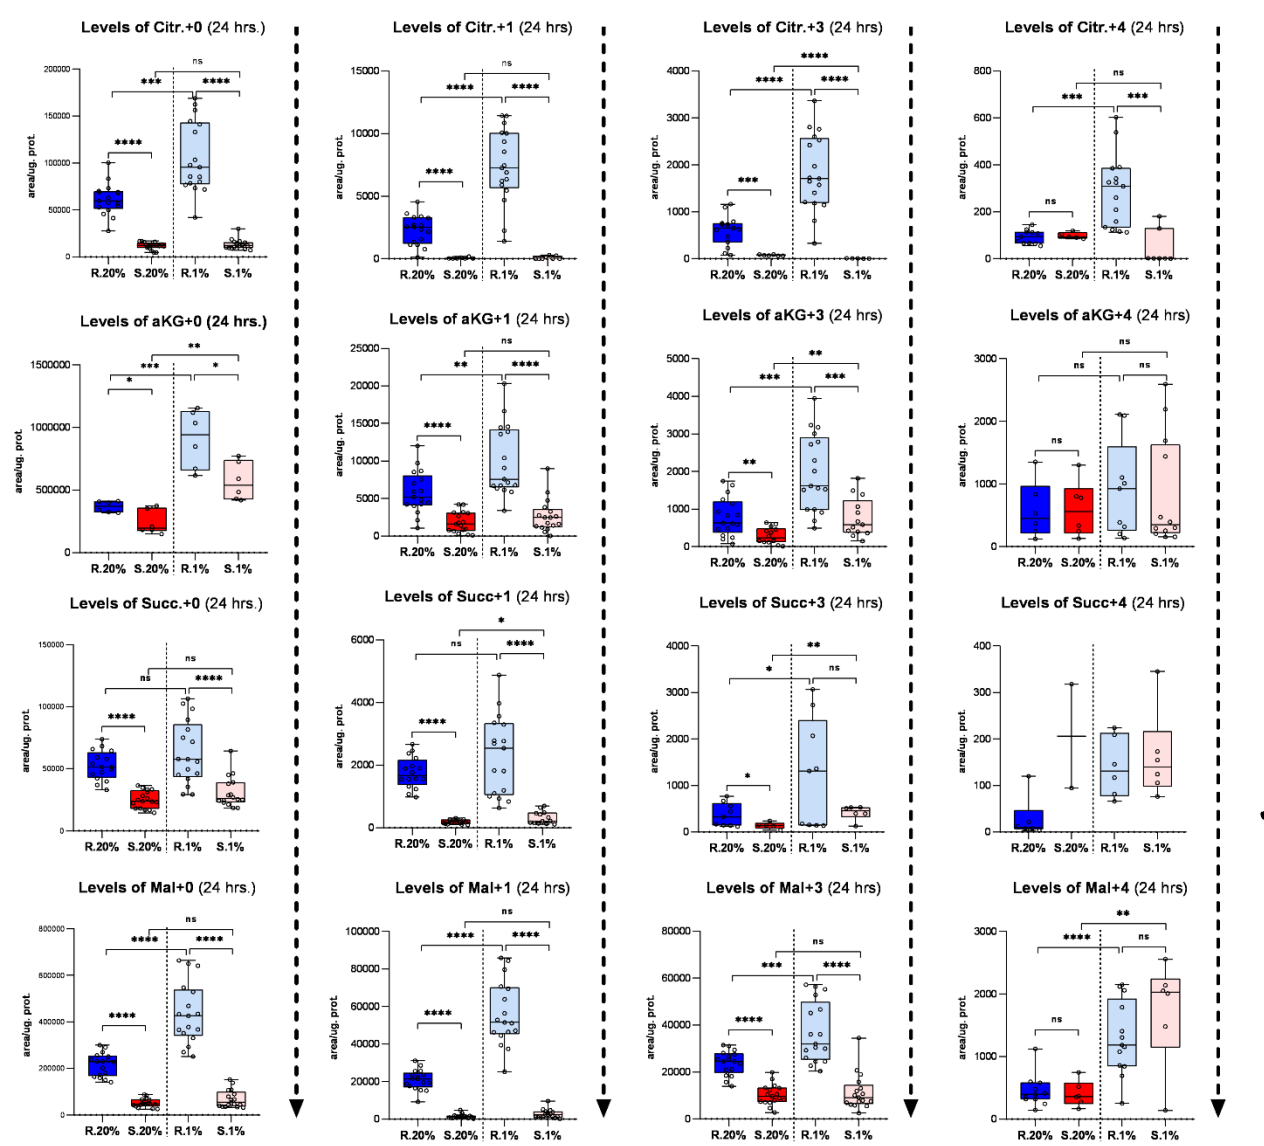

**Figure S3.** Selected mitochondrial fluxes of Glc-originated carbons in *Spalax* and rat skin cells grown for 1 day in  $^{13}\text{C}_6$  - glucose containing medium under normoxia and hypoxia. Panel A: comparisons between M+2 fluxes to HPro and TCA. Panel B: TCA cycle reactions. S.20%, R. 20%, S.1%, R1% represent *Spalax* (S) and rat (R) cells exposed to an atmosphere containing 20% or 1%  $\text{O}_2$ , respectively; ns, (nonsignificant)  $p>0.05$ ; \* $p<0.05$ ; \*\* $p<0.01$ ; \*\*\* $p<0.001$ ; \*\*\*\*  $p<0.0001$ , error bars represent standard deviation of 6 or more biological repeats. Every point on the chart represents one technical repeat.

Figure S 4

**M+1 flux to HPro**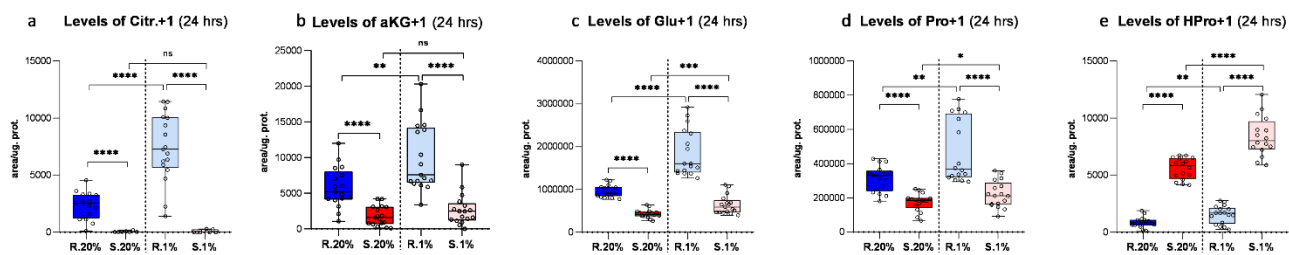**M+3 flux to HPro**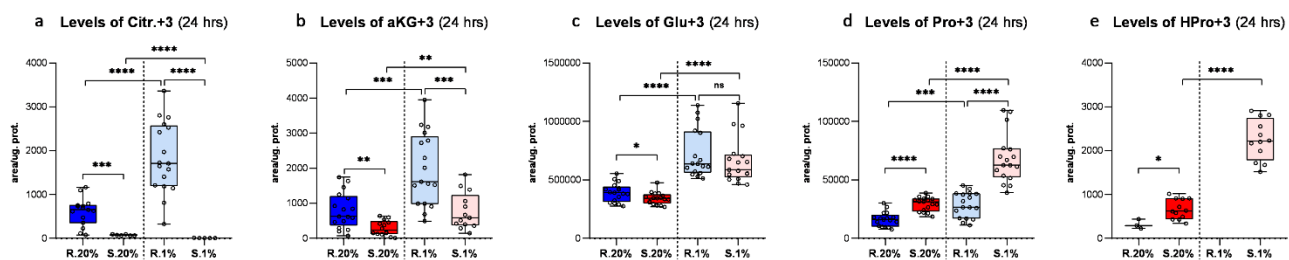**M+4 flux to HPro**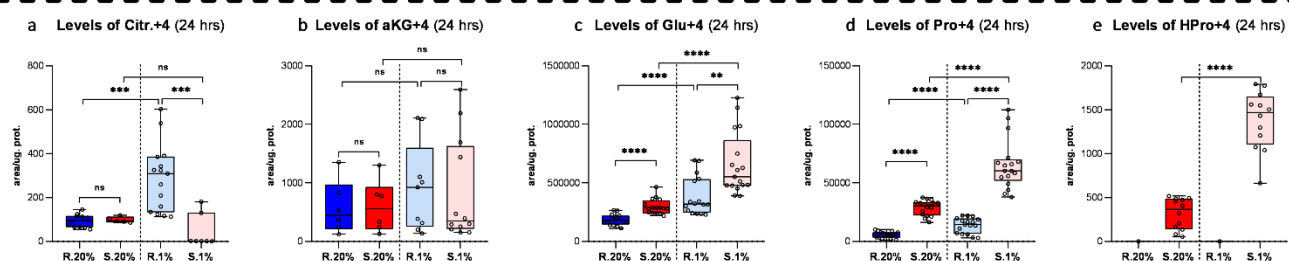**M+5 flux to HPro**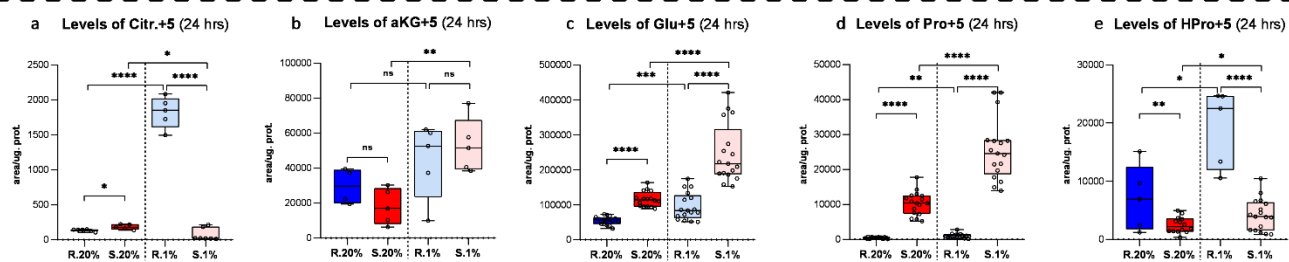**M+0 flux to HPro**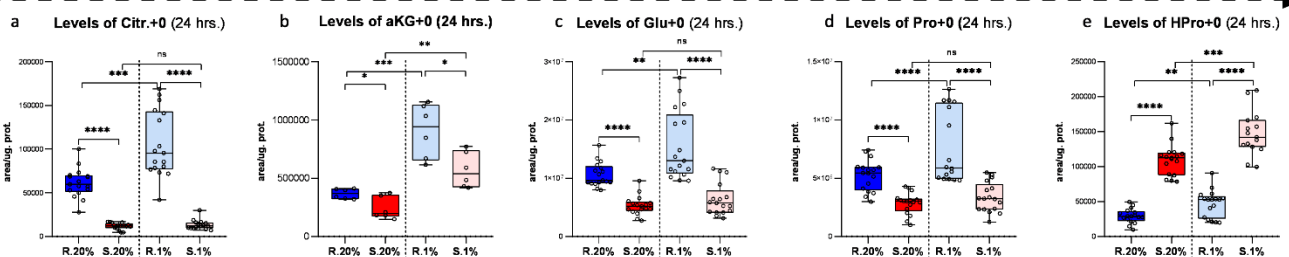

**Figure S4.** The distribution of measured metabolites along the axis  $\text{Citr} \rightarrow \alpha\text{KG} \rightarrow \text{Glu} \rightarrow \text{Pro} \rightarrow \text{HPro}$  in *Spalax* cells as compared to the rat under normoxic and hypoxic conditions. S.20%, R. 20%, S.1%, R1% represent *Spalax* (S) and rat (R) cells exposed to an atmosphere containing 20% or 1%  $\text{O}_2$ , respectively; ns, (nonsignificant)  $p > 0.05$ ; \* $p < 0.05$ ; \*\* $p < 0.01$ ; \*\*\* $p < 0.001$ ; \*\*\*\*  $p < 0.0001$ , error bars represent standard deviation of 6 or more biological repeats. Every point on the chart represents one technical repeat.

Figure S5

## Panel A

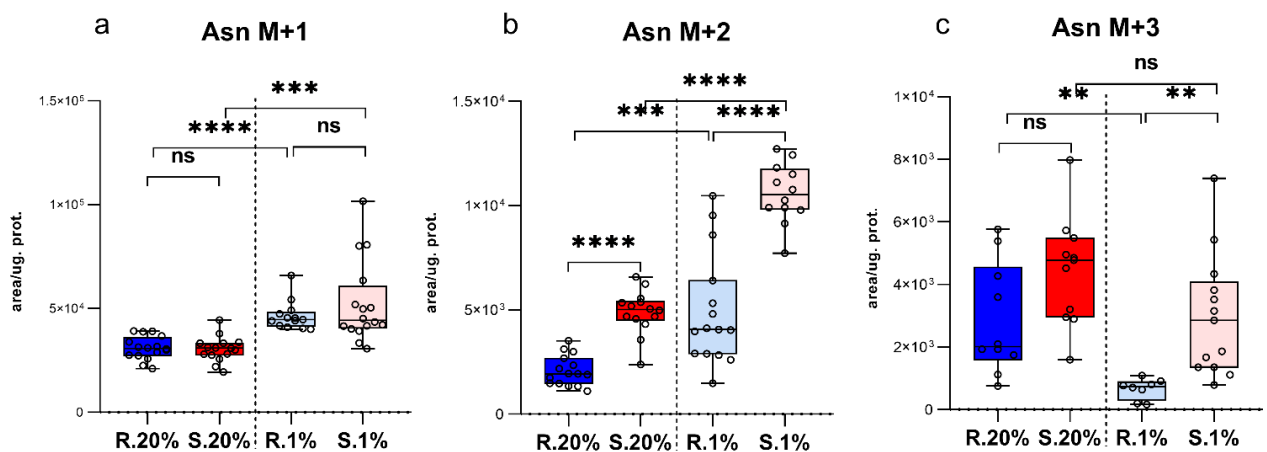

## Panel B

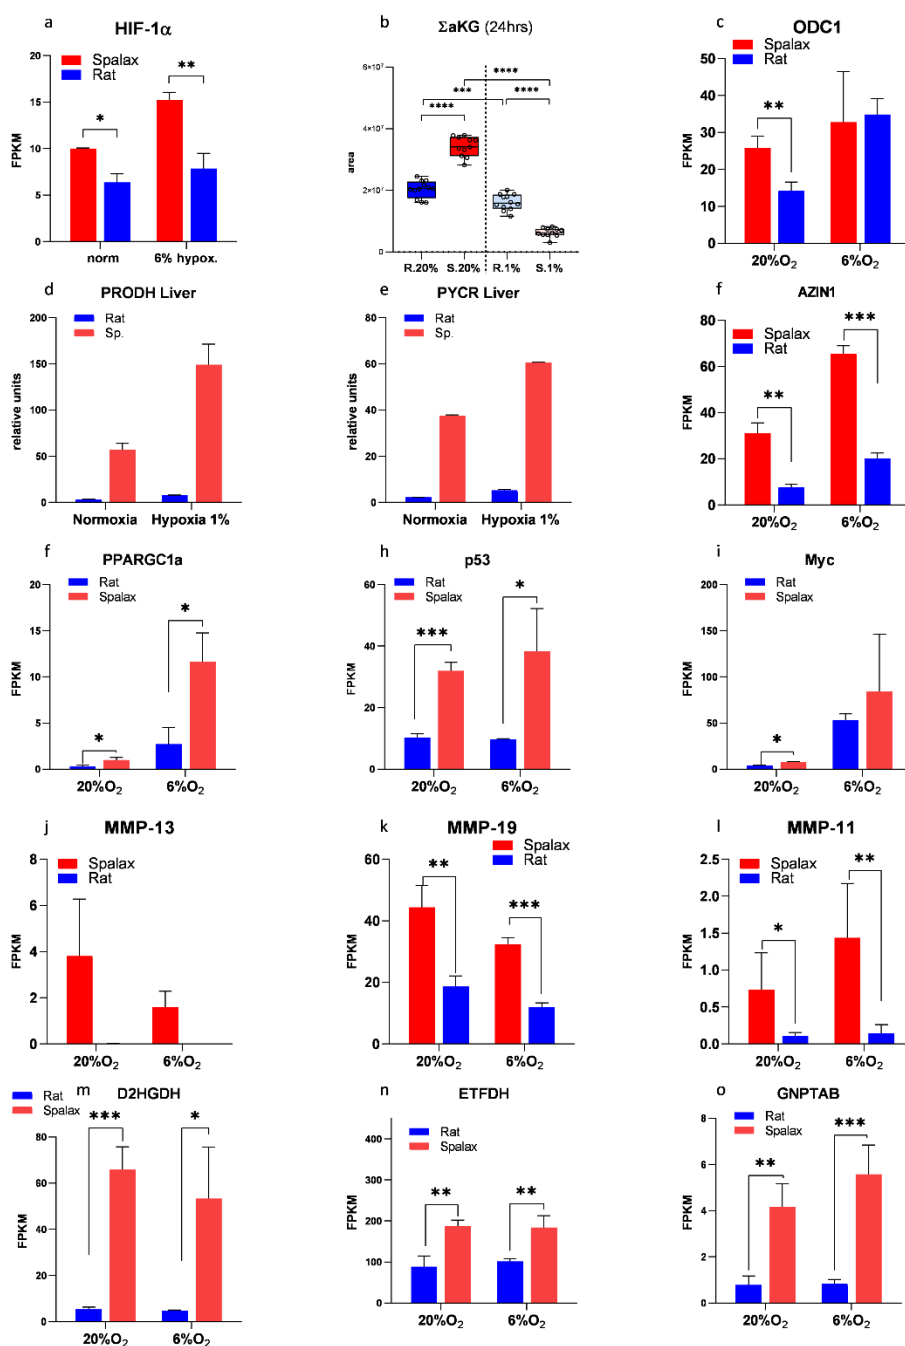

**Figure S5.** Panel A: Mass isotopologues of Asn containing Glc-derived carbons. . S.20%, R. 20%, S.1%, R1% represent *Spalax* (S) and rat (R) cells exposed to an atmosphere containing 20% or 1%  $O_2$ , respectively; ns, (nonsignificant)  $p > 0.05$ ; \* $p < 0.05$ ; \*\* $p < 0.01$ ; \*\*\* $p < 0.001$ ; \*\*\*\*  $p < 0.0001$ , error bars represent standard deviation of 6 or more biological repeats. Every point on the chart represents one technical repeat. **Panel B:** The levels of selected intracellular metabolites in *Spalax* and rat cells under normoxic and hypoxic conditions and mRNA expression of selected genes in *Spalax* liver tissues under normoxia and hypoxia (Retrieved from Reference # 62). FPKM, fragments Per Kilobase of transcript per Million mapped reads.
